# Supplementary material for: A dynamic ammonia emission model and the online coupling with WRF-Chem (WRF-SoilN-Chem v1.0): development and evaluation
Source: Copernicus journal article supplement (doi:10.5194/gmd-2022-231), 2022-10-11
Supplement: Supplementary file [file gmd-2022-231-AC2-supplement.pdf]

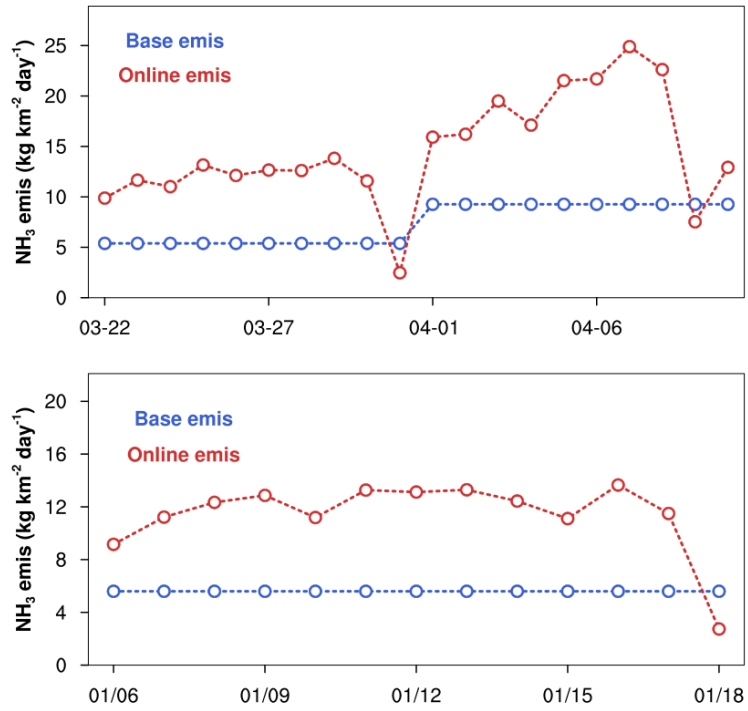

Figure R1: (a) Time series of total ammonia (NH<sub>3</sub>) emissions from 22<sup>nd</sup> March to 11<sup>th</sup> April 2019 in Nanjing site. (b) Time series of total ammonia (NH<sub>3</sub>) emissions from 6<sup>th</sup> to 18<sup>th</sup> January 2015 in Beijing site. Blue lines represent the MEIC inventory used in Base simulation, red lines represent Online emissions from WRF-SoilN-Chem.

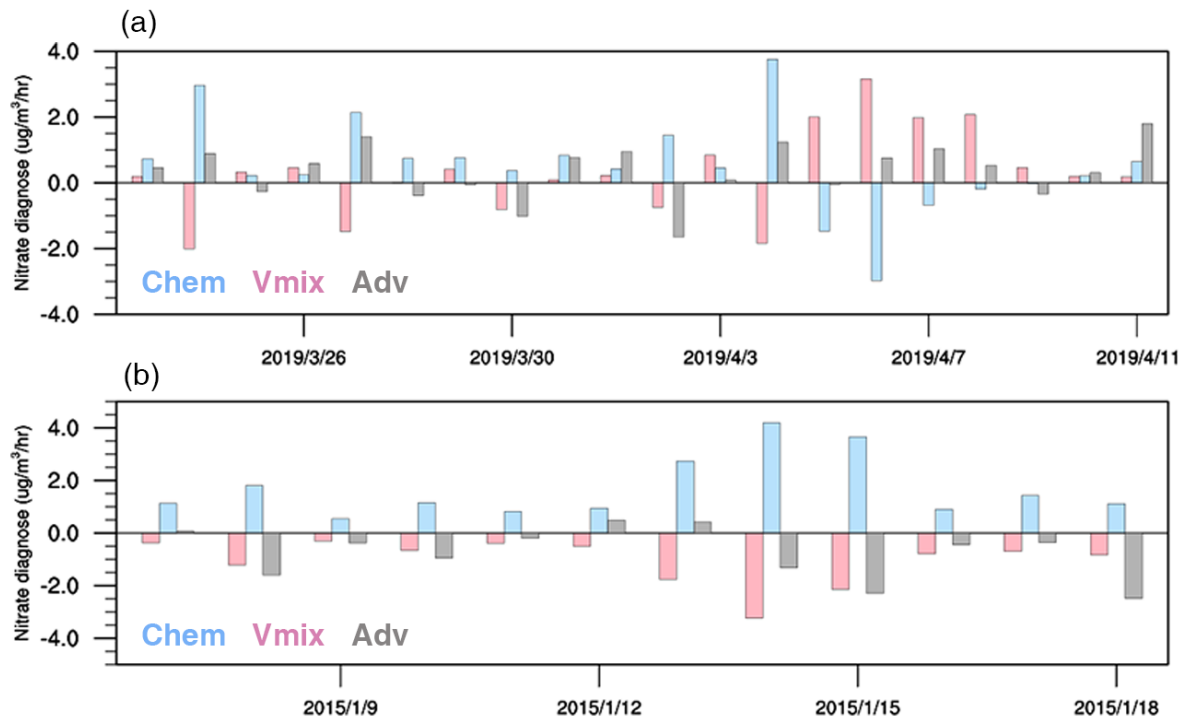

Figure R2. Daily variation of nitrate changes due to chemical production (chem) and PBL evolution (vmix) and advection (adv) calculated from WRF-Chem analysis for the Nanjing (a) and Beijing (b) Case, respectively.

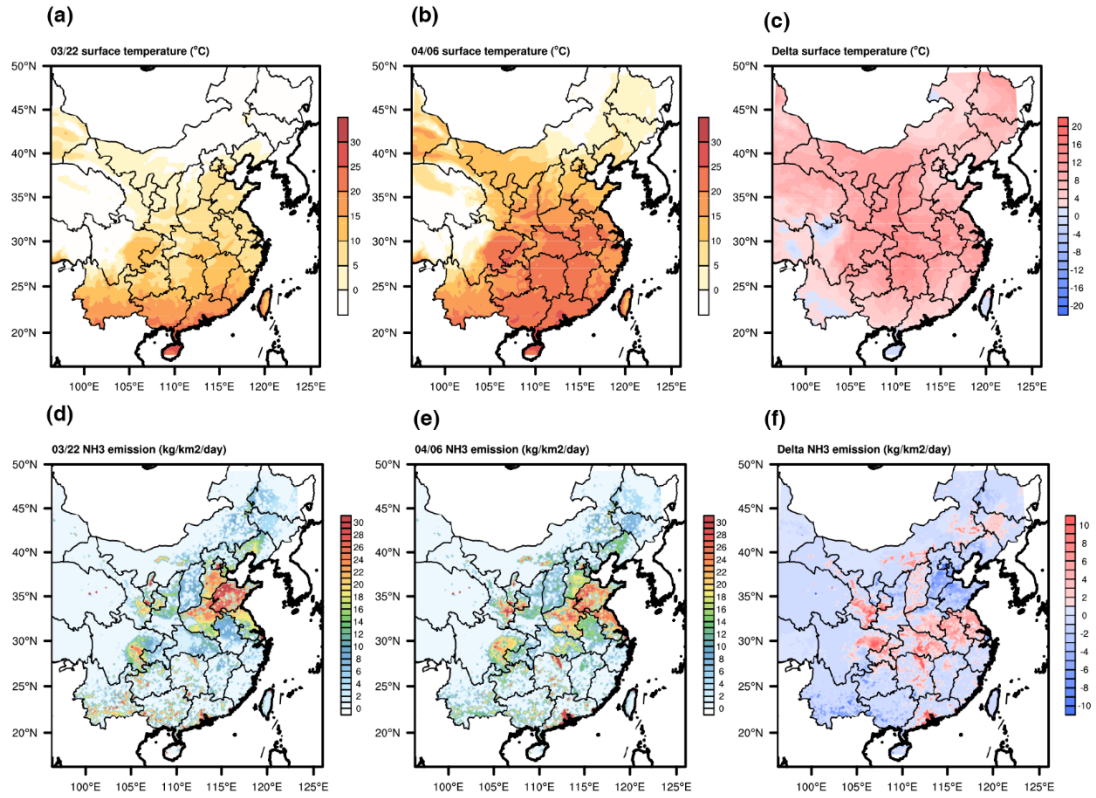

Figure R3. Distribution of surface daily mean temperature of east China on (a) March 22<sup>nd</sup> and (b) April 6<sup>th</sup> in 2019 and (c) the difference between these two days. (d)(e)(f) are same as above, but for surface ammonia emission rate.
